# Supplementary material for: Morphological characterization of fullerene–androsterone conjugates
Source: publisher site journal article supplement (doi:10.3762/bjnano.5.43), 2014-03-28

## Supporting Information

for

### **Morphological characterization of fullerene–androsterone conjugates**

Alberto Ruiz<sup>1</sup>, Margarita Suárez<sup>1</sup>, Nazario Martin<sup>2</sup>, Fernando Albericio<sup>\*3,4,5,6</sup> and Hortensia Rodríguez<sup>\*3</sup>

Address: <sup>1</sup>Laboratorio de Síntesis Orgánica, Facultad de Química, Universidad de La Habana, 10400 La Habana, Cuba; <sup>2</sup>Departamento de Química Orgánica I, Facultad de Ciencias Químicas, Universidad Complutense de Madrid 28040 Madrid, Spain; <sup>3</sup>Institute for Research in Biomedicine, Barcelona Science Park, Baldiri Reixac 10, 08028-Barcelona, Spain; <sup>4</sup>Centre on Bioengineering, Biomaterials and Nanomedicine, PCB, 08028-Barcelona, Spain; <sup>5</sup>Department of Organic Chemistry, University of Barcelona, 08028-Barcelona, Spain; and <sup>6</sup>School of Chemistry, University of KwaZulu-Natal, Durban 4001, South Africa

Email: Hortensia Rodríguez\* - hortensia.rodriguez@irbbarcelona.org;

Fernando Albericio\* - fernando.albericio@irbbarcelona.org

\* Corresponding author

**TEM images and dynamic light scattering data for the C<sub>60</sub>-androsterone conjugates Ia-b  
and IIa,b**

**Uranyl acetate negative stained transmission electron micrographs (TEM) of fullerene-  
androsterone conjugates Ia-b and IIa-b.**

*N*-Methyl-2-substituted-pyrrolidino[3,4:1,2]-[60]fullerenes (**Ia-b** and **IIa-b**)

*N*-Methyl-2(R)-(3'-chloro-17'-oxo-(5 $\alpha$ -antrostan-2'-en-2-yl)-pyrrolidino[3,4:1,2][60]fullerene (**Ia**)

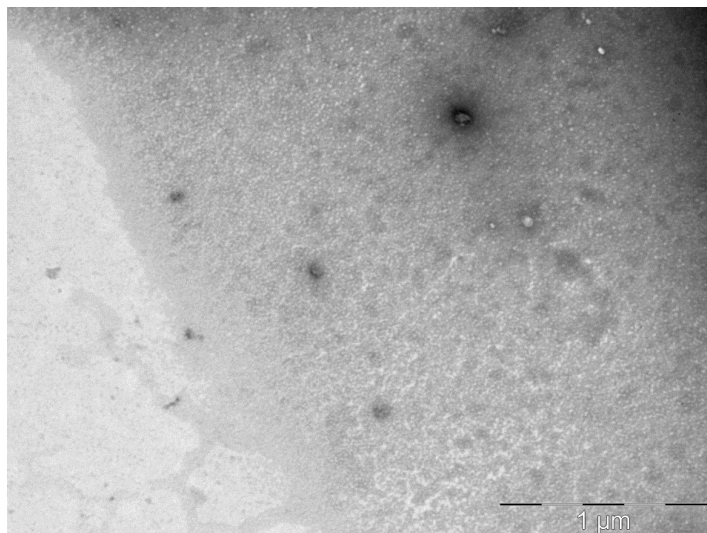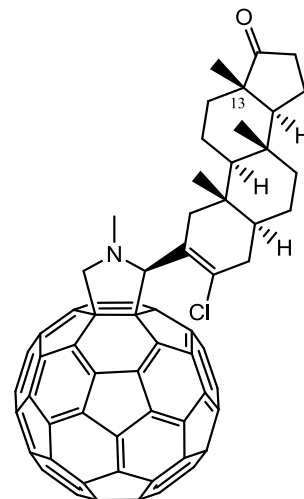

**Ia**

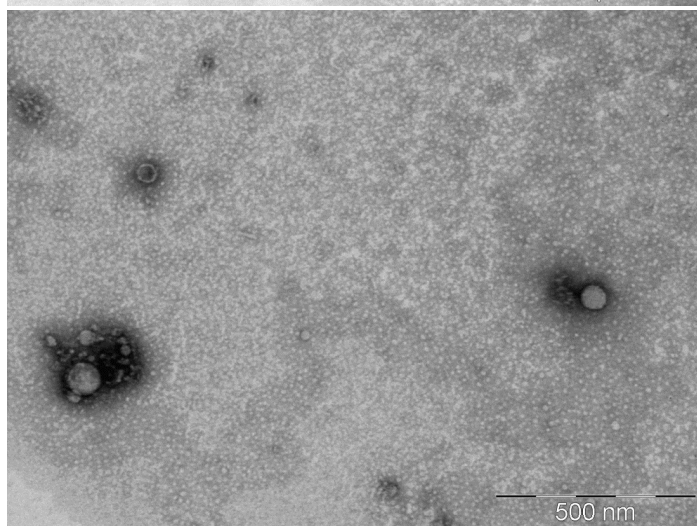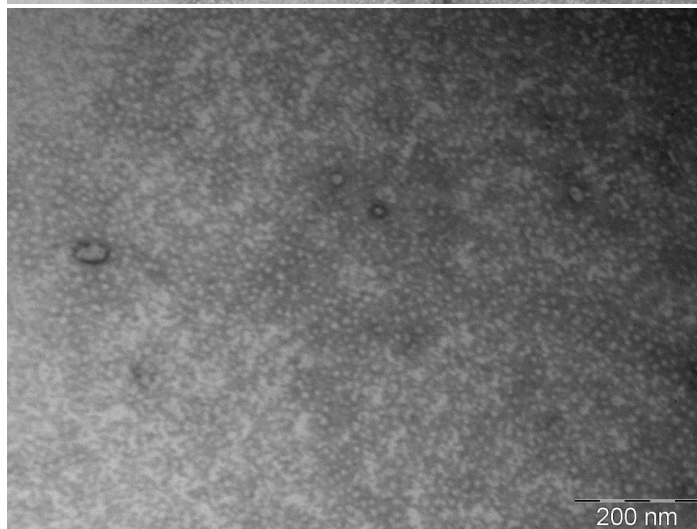



*N*-Methyl-2(R)-(3' $\beta$ -acetoxy-17'-chloro-5 $\alpha$ -androstan-16-en-2-yl)pyrrolidino[3,4:1,2][60]fullerene (**IIa**)

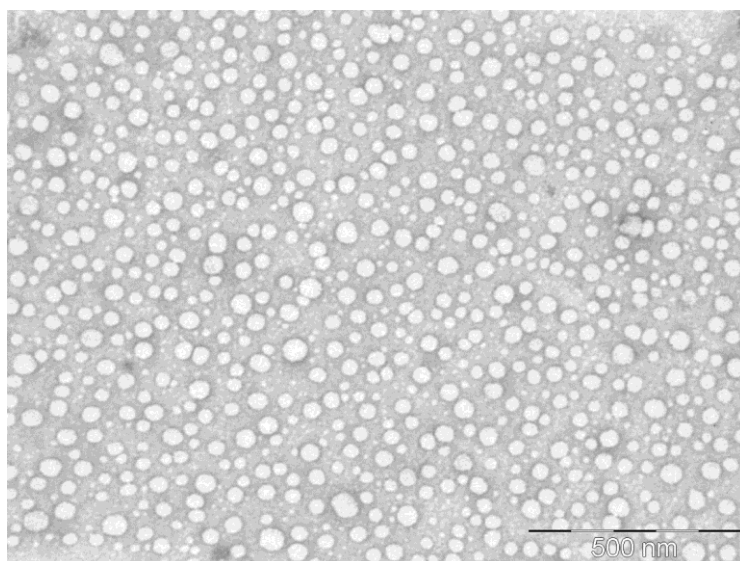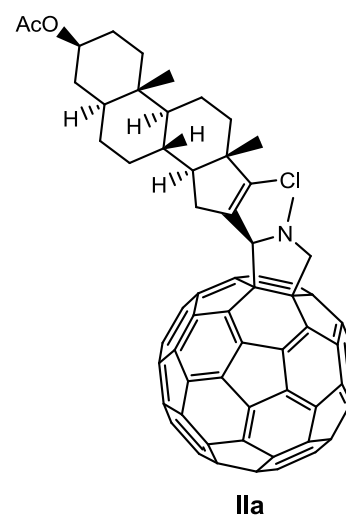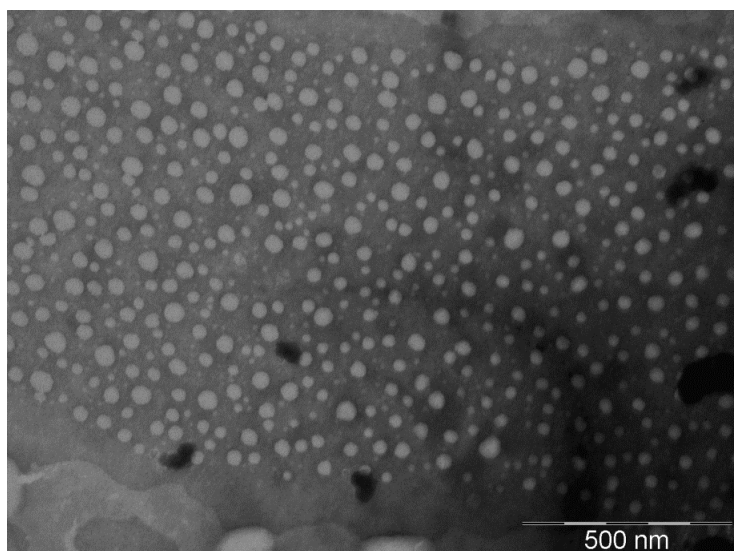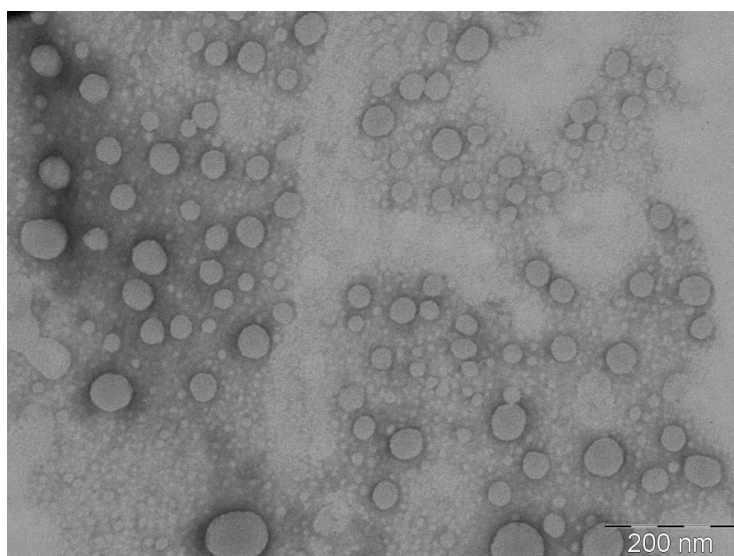

*N*-Methyl-2(S)-(3' $\beta$ -acetoxy-17'-chloro-5 $\alpha$ -androstan-16-en-2-yl)pyrrolidino[3,4:1,2][60]fullerene (**IIb**)

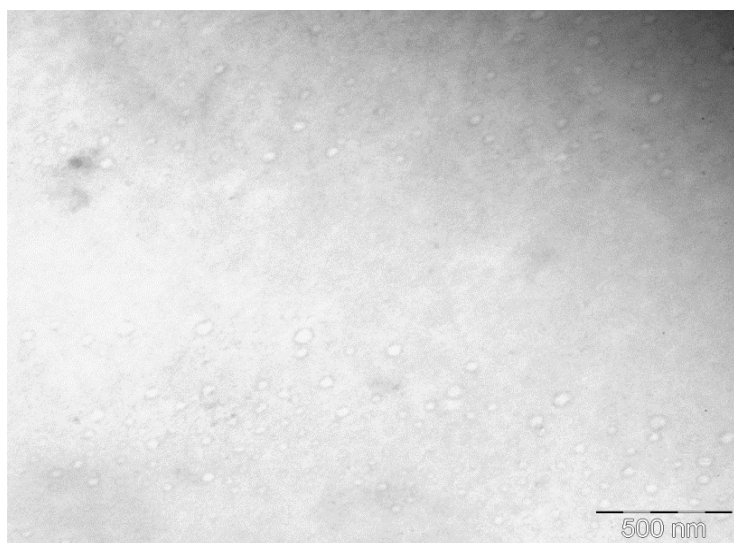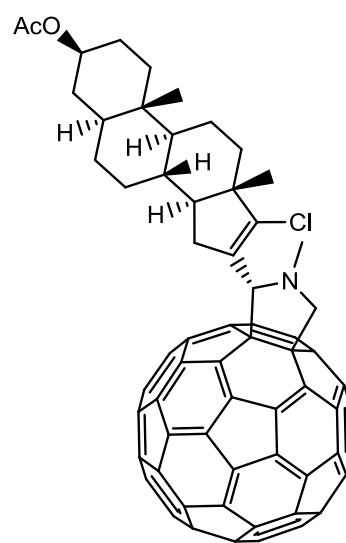

**IIb**

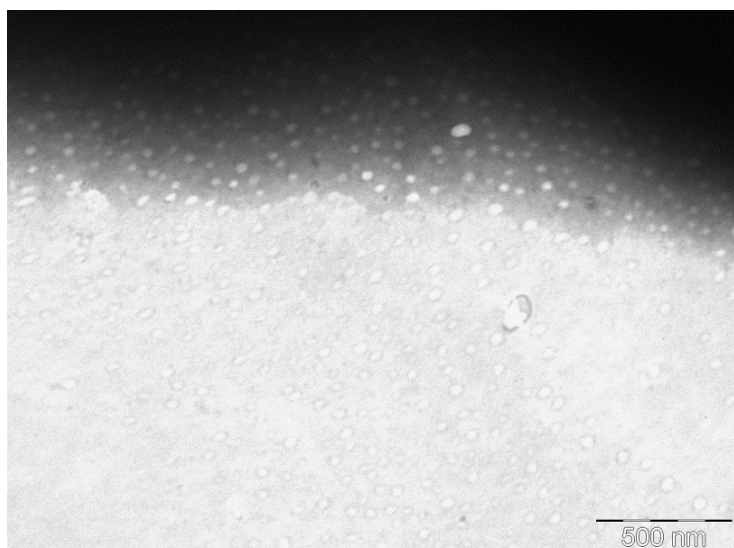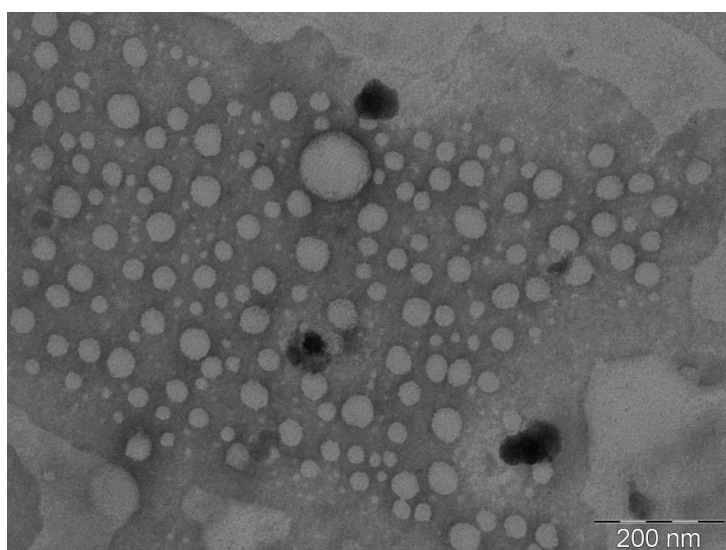

## Dynamic Light Scattering data

Histogram analyses of the particle size distribution by number, by volume and by intensity.

*N*-Methyl-2(R)-(3'-chloro-17'-oxo-(5 $\alpha$ -antrostan-2'-en-2-yl)-pyrrolidino[3,4:1,2][60]fullerene (Ia)  
Concentration: 0.1 mgmL<sup>-1</sup>

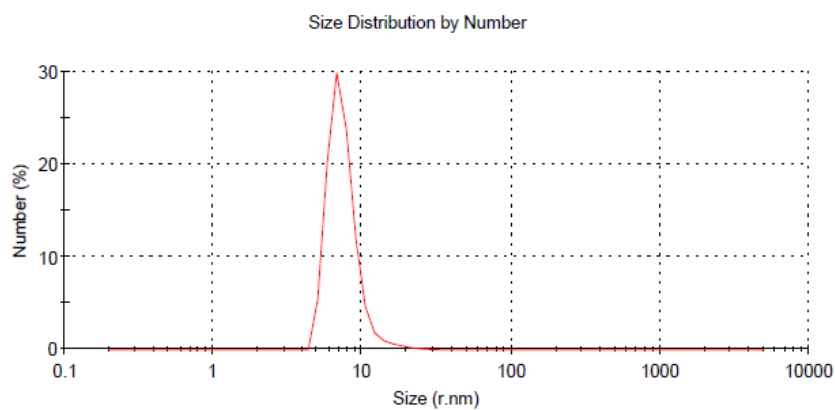

**Pdl: 0.393**

**Intercept: 0.960**

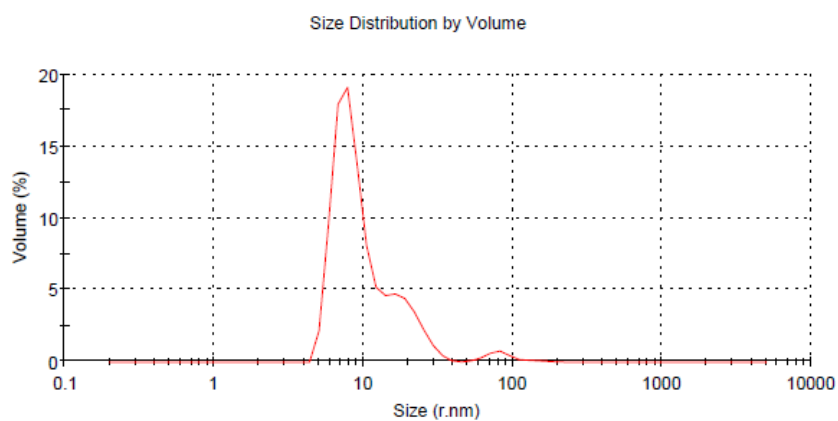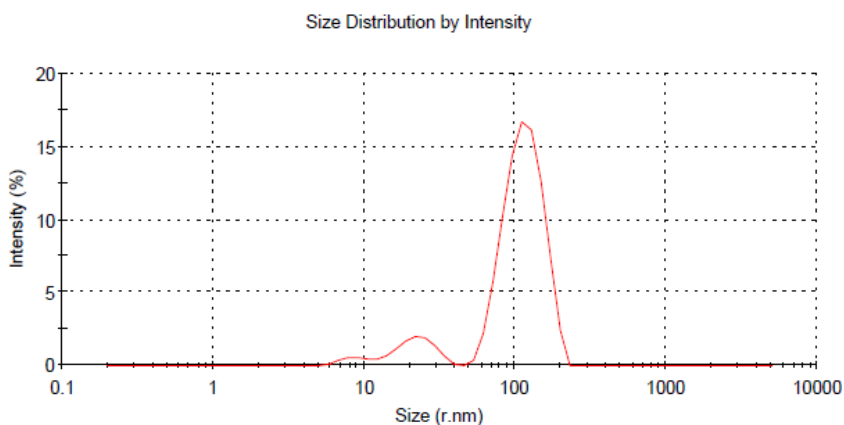

Concentration:  $0.4 \text{ mgmL}^{-1}$

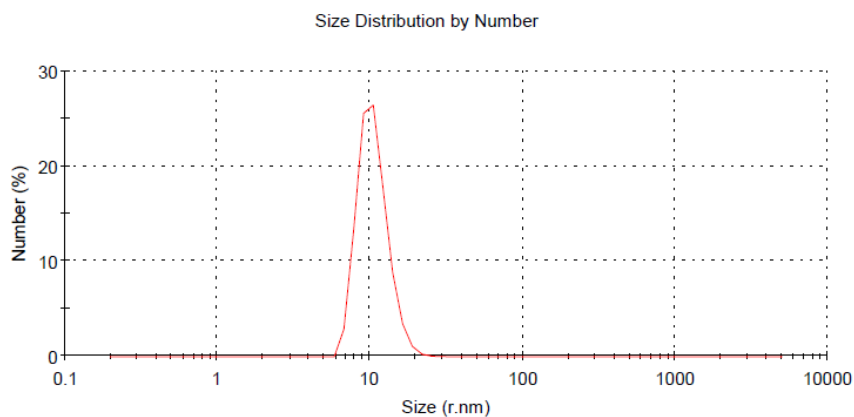

**Pdl: 0.494**  
**Intercept: 0.941**

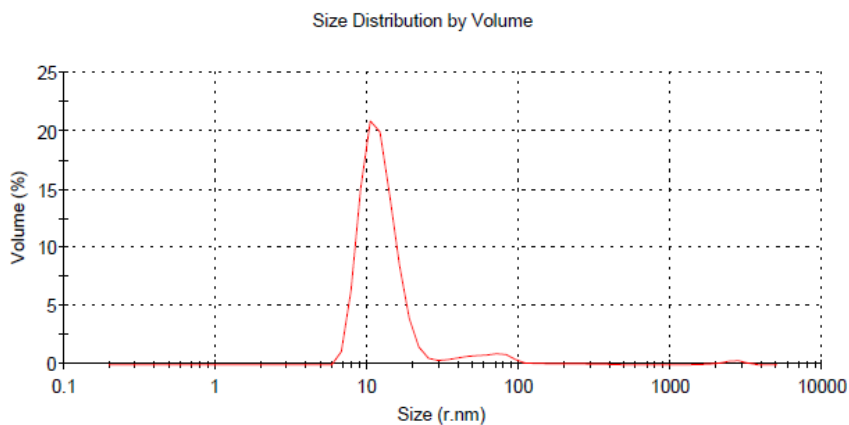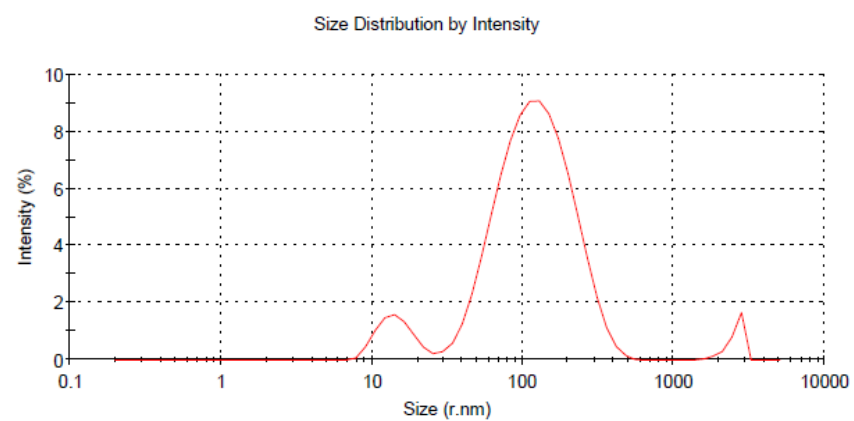

*N*-Methyl-2(S)-(3'-chloro-17'-oxo-(5 $\alpha$ -antrostan-2'-en-2-yl)-pyrrolidino[3,4:1,2][60]fullerene (**1b**)  
Concentration: 0.1 mgmL<sup>-1</sup>

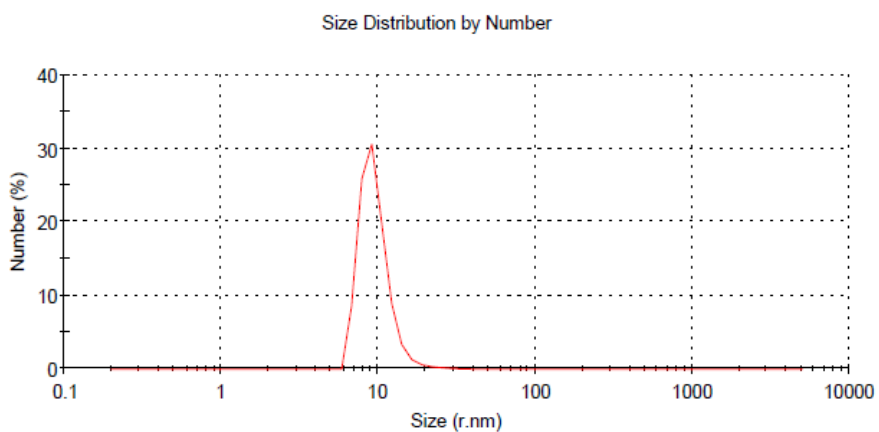

**PdI: 0.454**  
**Intercept: 0.941**

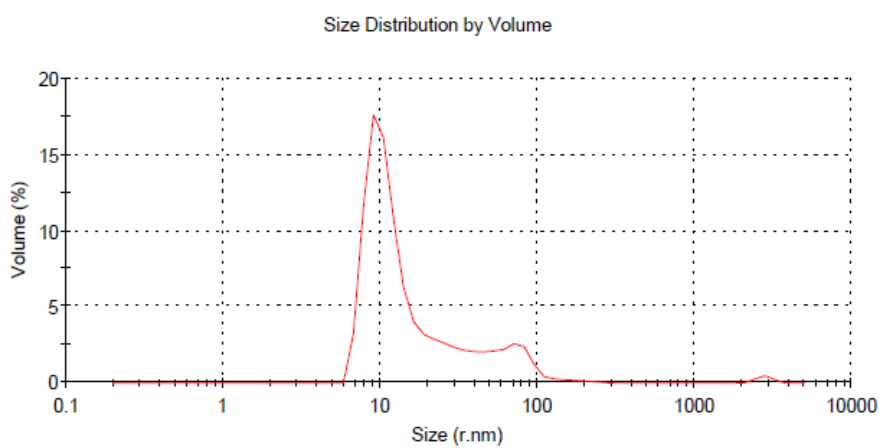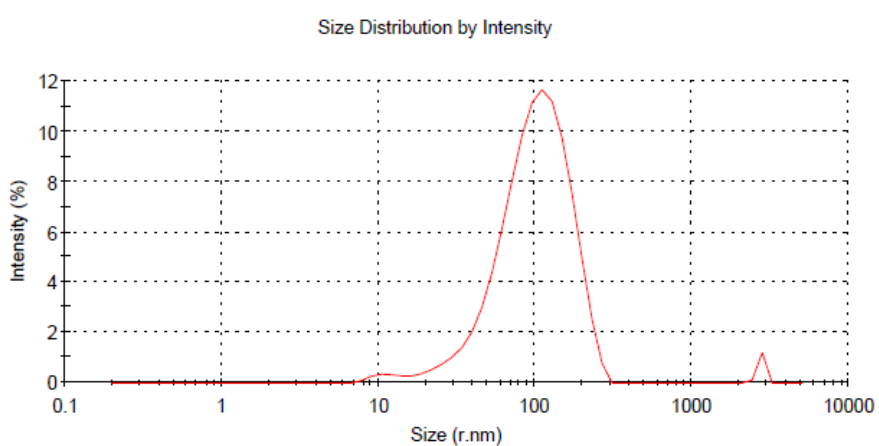



Concentration: 0.4 mgmL<sup>-1</sup>

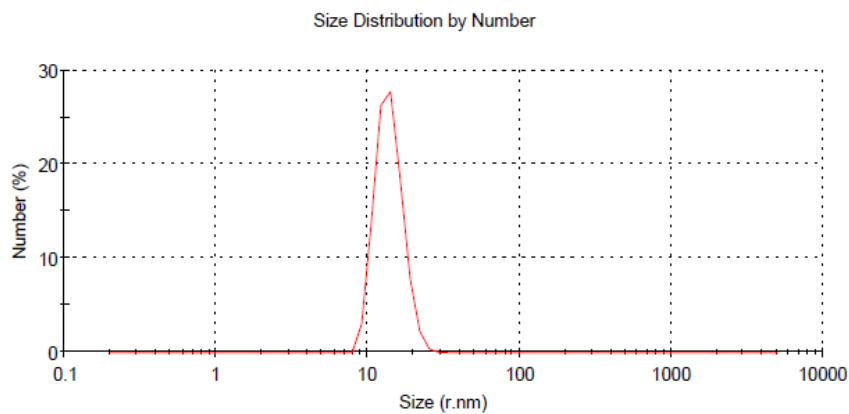

**PdI: 0.339**  
**Intercept: 0.930**

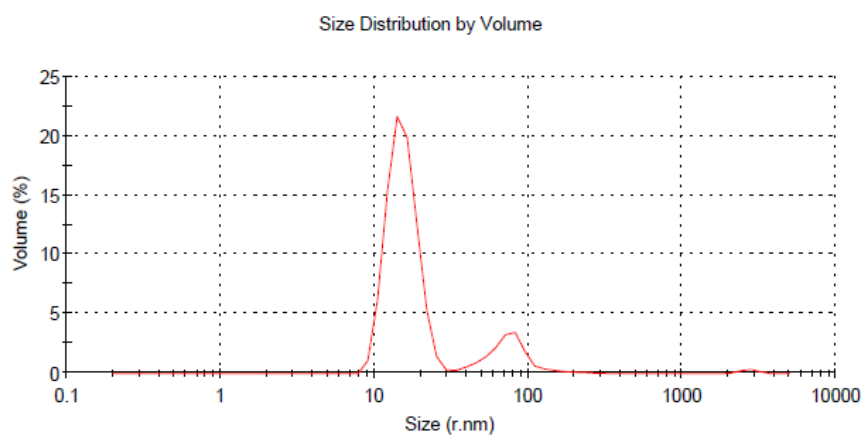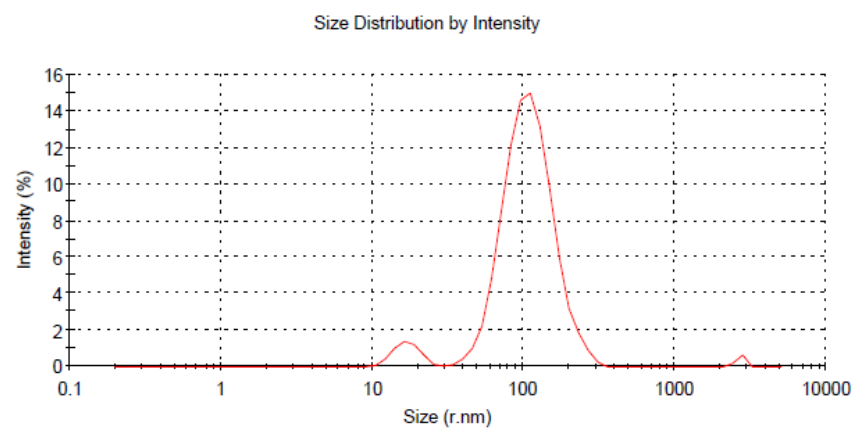

*N*-Methyl-2(R)-(3' $\beta$ -acetoxy-17'-chloro-5 $\alpha$ -androstane-16-en-2-yl)pyrrolidino[3,4:1,2][60]fullerene (IIa)

Concentration: 0.1 mgmL<sup>-1</sup>

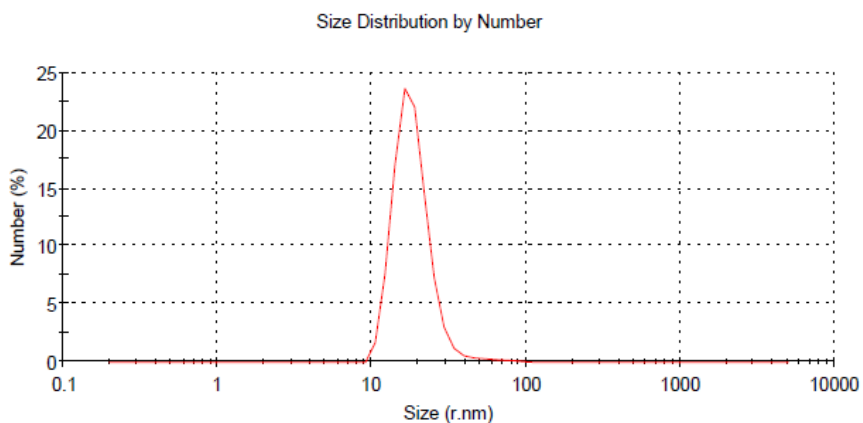

**Pdl: 0.409**

**Intercept: 0.952**

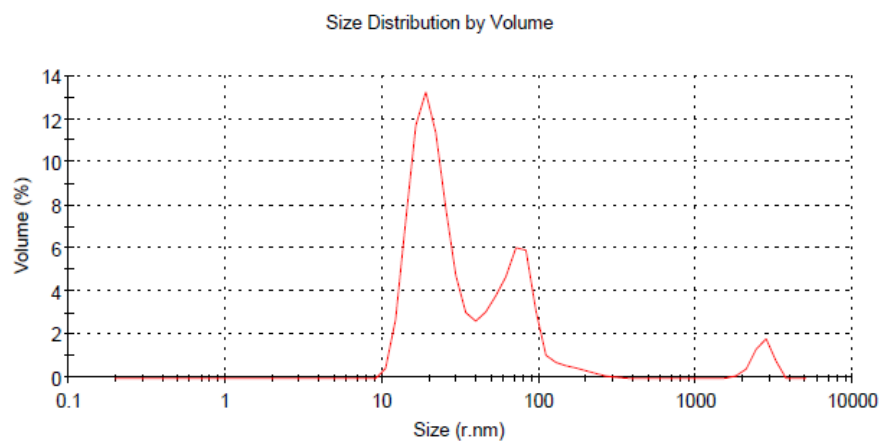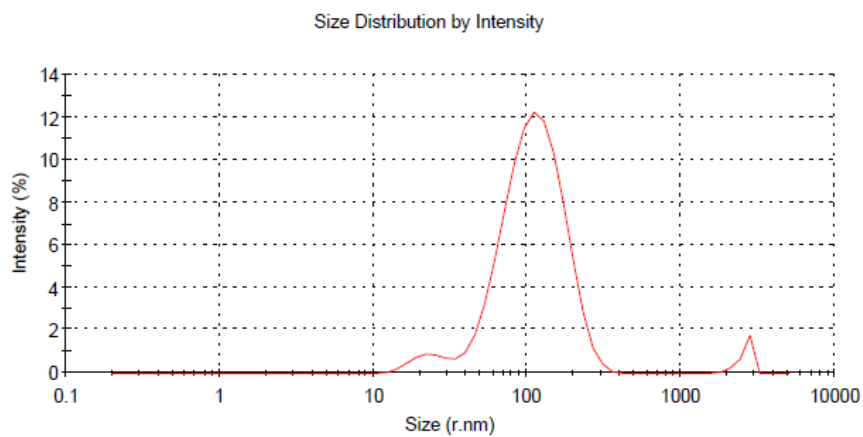

Concentration: 0.4 mgmL<sup>-1</sup>

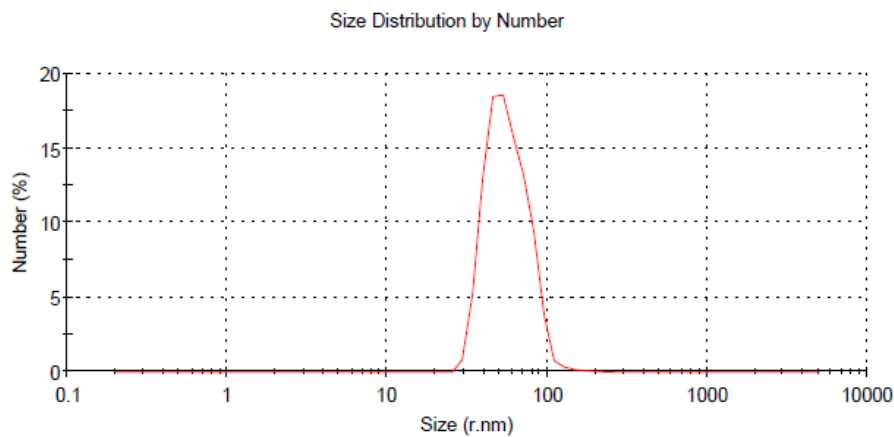

**Pdl: 0.301**  
**Intercept: 0.942**

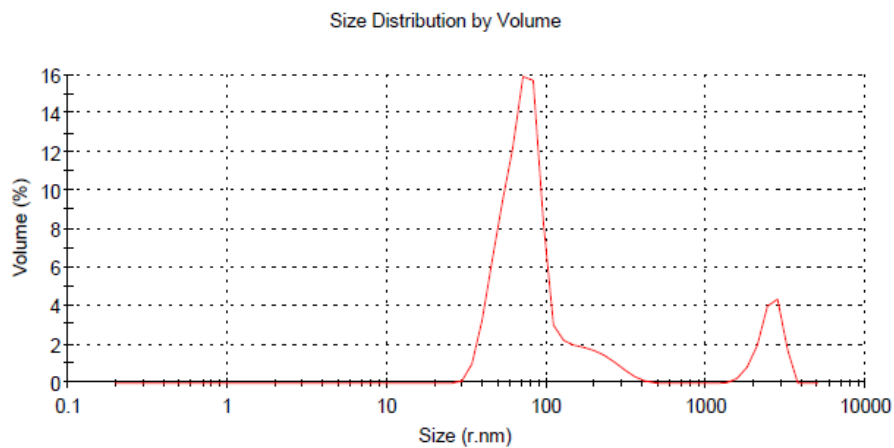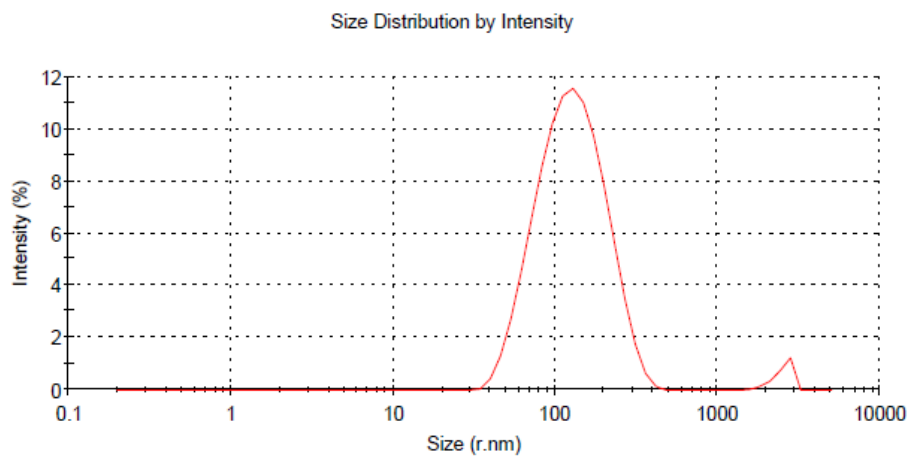

*N*-Methyl-2(S)-(3'β-acetoxy-17'-chloro-5α-androstan-16-en-2-yl)pyrrolidino[3,4:1,2][60]fullerene (**IIb**)

Concentration: 0.1 mgmL<sup>-1</sup>

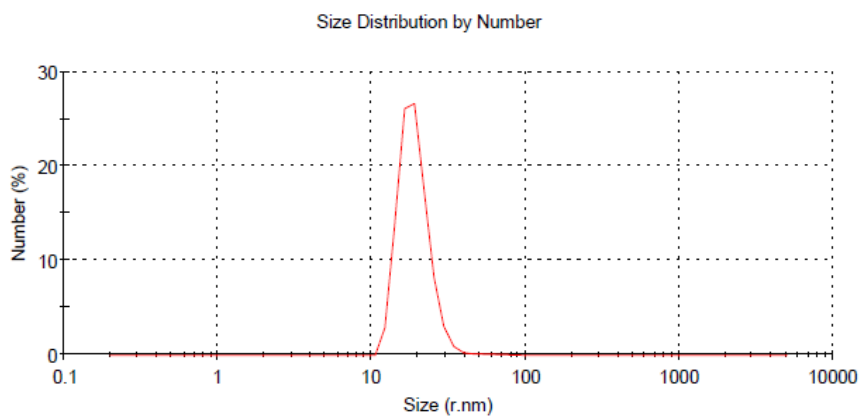

**Pdl:** 0.393  
**Intercept:** 0.940

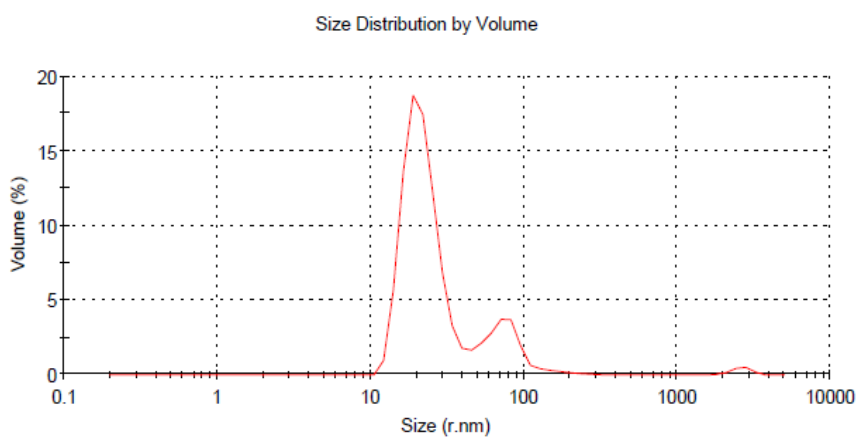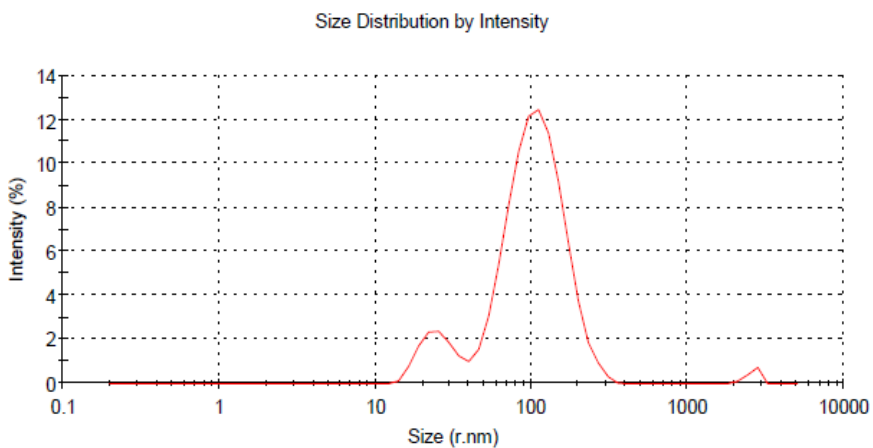

Concentration:  $0.4 \text{ mgmL}^{-1}$

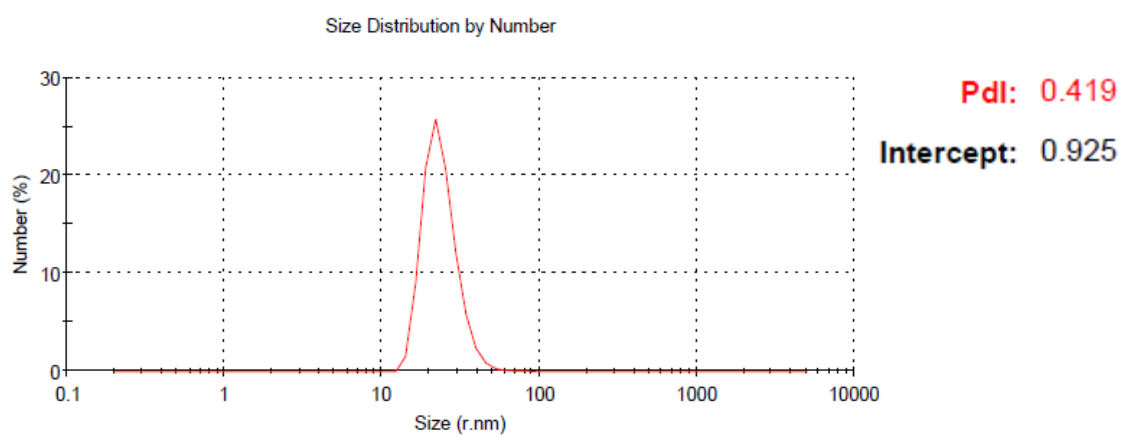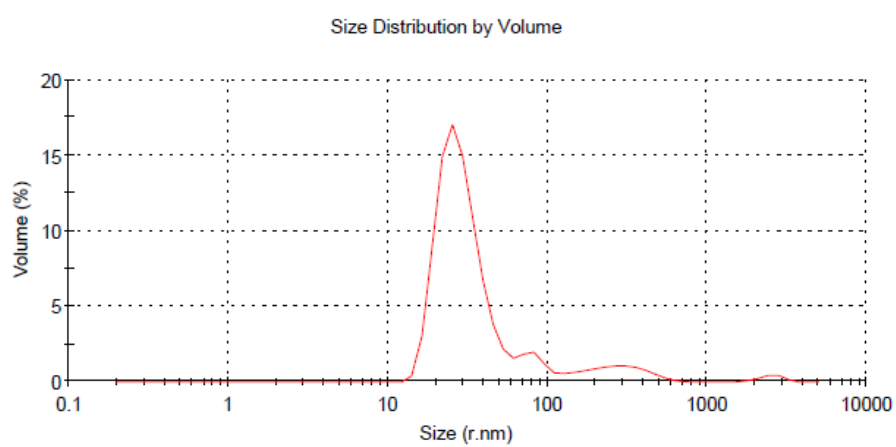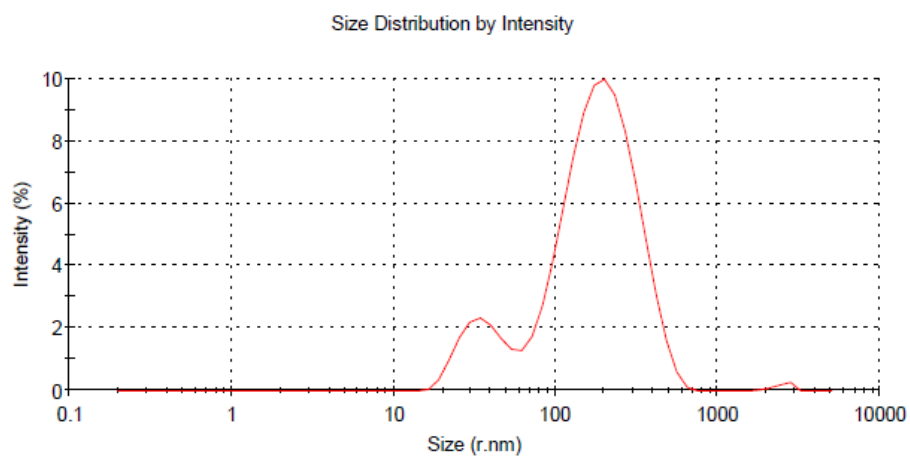

Supplement: Additional file 1 [file 2190-4286-5-43-S1.pdf]
